# Supplementary material
Source: MDPI journal article supplement (doi:10.3390/horticulturae12050590)
Supplement: s1 [file horticulturae-4223073-supplementary.pdf › horticulturae-4223073-supplementary.pdf]

Table S1 The situation and introduction of some watermelon producing regions in China at present.

| Region                        | Northern China (NC)                   | Northwest (NW)                | Southwest (SW)             |
|-------------------------------|---------------------------------------|-------------------------------|----------------------------|
| Climate                       | Temperate Continental Monsoon Climate | Temperate continental climate | Plateau mountain climate   |
| MAP (mm)                      | 500-1000                              | <300                          | >900                       |
| MAT (°C)                      | 8.0-13                                | 1.0-16                        | 4.0-18                     |
| MAS (h)                       | 1800-2300                             | 2400-2800                     | 1000-1400                  |
| Soil Type                     | Hapli-Udic Argosols                   | Loessi-Orthic Primosols       | Typic Purli-Udic Cambosols |
| Soil Texture                  | Loam                                  | Sandy                         | Clay                       |
| Area (10 <sup>3</sup> ha)     | 623.9 (33.5%)                         | 244.2 (13.1%)                 | 109.8 (5.9%)               |
| Output (10 <sup>6</sup> tons) | 34.4 (45.1%)                          | 9.32 (12.2%)                  | 2.80 (3.7%)                |
| Yield (t ha <sup>-1</sup> )   | 55.1                                  | 38.1                          | 25.5                       |
| Research area                 | Henan and Hebei                       | Gansu and Ningxia             | Sichuan and Chongqing      |

These data were derived from the book entitled “Study on the Industrial Economy’s Development of Watermelon and Muskmelon”. MAS, MAT and MAP represent mean annual sunshine, temperature and mean annual precipitation, respectively. Planting area, output and yield were derived from China agricultural statistics report 2015. The percentages in brackets represented local proportions in the whole country

Table S2 Main pollutant emissions and energy use of agricultural inputs at the agricultural materials stage

| Item                            | Unit                             | Global warming<br>(kg CO <sub>2</sub> -eq unit <sup>-1</sup> ) | Acidification<br>(kg SO <sub>2</sub> -eq unit <sup>-1</sup> ) | Eutrophication<br>(kg PO <sub>4</sub> -eq unit <sup>-1</sup> ) | Energy equivalent<br>(MJ unit <sup>-1</sup> ) | Water consumption<br>(m <sup>3</sup> unit <sup>-1</sup> ) | References |
|---------------------------------|----------------------------------|----------------------------------------------------------------|---------------------------------------------------------------|----------------------------------------------------------------|-----------------------------------------------|-----------------------------------------------------------|------------|
| Diesel fuel                     | L                                | 3.75                                                           | 0.0658                                                        | 0.0119                                                         | 47.8                                          | -                                                         | [1–4]      |
| Electricity                     | kWh                              | 0.75                                                           | 0.0145                                                        | 0.00084                                                        | -                                             | -                                                         | [4]        |
| N production and transportation | kg N                             | 8.3                                                            | 0.0252                                                        | 0.00303                                                        | 50.5                                          | 1.1                                                       | [1,4,5]    |
| P production and transportation | kg P <sub>2</sub> O <sub>5</sub> | 0.79                                                           | 0.0006                                                        | 0.00008                                                        | 5.00                                          | 1.696                                                     | [1,4,5]    |
| K production and transportation | kg K <sub>2</sub> O              | 0.55                                                           | 0.00048                                                       | 0.00006                                                        | 14.7                                          | -                                                         | [1,4,5]    |
| Manure production               | kg                               | -                                                              | -                                                             | -                                                              | 0.3                                           | -                                                         | [6]        |
| Pesticide                       | kg                               | 19.1                                                           | 0.0105                                                        | 0.00194                                                        | 238                                           | 3.6                                                       | [1,4,7]    |
| PE                              | kg                               | 0.1                                                            | 0.00135                                                       | 0.0001                                                         | 32.3                                          | -                                                         | [8]        |

Table S3 The quantity of pollutant emitted (expressed as a percentage of inputs) at the arable farming stage

| Pollution emission                    | Emission factors                                             | References |
|---------------------------------------|--------------------------------------------------------------|------------|
| NH <sub>3</sub> emissions             | 11% of N fertilizer input                                    | [9]        |
| NO <sub>3</sub> <sup>-</sup> leaching | 10% of N fertilizer input                                    | [10]       |
| N <sub>2</sub> O OM Direct            | 1% of organic N fertilizer input                             | [11]       |
| N <sub>2</sub> O CE Direct            | 0.8% of Chemical N fertilizer input                          | [12]       |
| N <sub>2</sub> O Indirect             | 1% NH <sub>3</sub> emission+ 2.5% NO <sub>3</sub> emission   | [13,14]    |
| NO <sub>x</sub> emissions             | 10% N <sub>2</sub> O <sub>Total</sub>                        | [13]       |
| Phosphorus loss                       | 0.2% of total P <sub>2</sub> O <sub>5</sub> fertilizer input | [15]       |

Table S4 Normalization values and weights for different impact categories

| Impact category          | Unit                  | Standard Value/(kg/person/a) | Weight |
|--------------------------|-----------------------|------------------------------|--------|
| Water depletion          | m <sup>3</sup> /t     | 2193.9                       | 0.12   |
| Energy depletion         | MJ/a                  | 2590457                      | 0.15   |
| Land occupation          | m <sup>2</sup> /t     | 988.17                       | 0.13   |
| Global warming potential | kgCO <sub>2</sub> -eq | 6869                         | 0.12   |
| Acidification potential  | kgSO <sub>2</sub> -eq | 52.26                        | 0.14   |
| Eutrophication potential | kgPO <sub>4</sub> -eq | 1.88                         | 0.12   |

Table S5 The resource burden and environmental impacts in China in different agriculture production systems.

| <b>Plant</b>                | <b>GHG</b>                  | <b>AP</b>                  | <b>EP</b>                   | <b>LO</b>            | <b>WD</b>            | <b>ED</b>      | <b>References</b>    |
|-----------------------------|-----------------------------|----------------------------|-----------------------------|----------------------|----------------------|----------------|----------------------|
| <b>Unit: t<sup>-1</sup></b> | <b>kg CO<sub>2</sub>-eq</b> | <b>kgSO<sub>2</sub>-eq</b> | <b>kg PO<sub>4</sub>-eq</b> | <b>m<sup>2</sup></b> | <b>m<sup>3</sup></b> | <b>MJ</b>      |                      |
| <b>Fruits</b>               |                             |                            |                             |                      |                      |                |                      |
| <b>Watermelon</b>           | <b>87-150</b>               | <b>1.97-3.32</b>           | <b>0.64-0.99</b>            | <b>200-571</b>       | <b>11-16.5</b>       | <b>549-885</b> | <b>in this study</b> |
| Strawberry                  | 118                         | 0.94                       | 0.80                        |                      |                      | 2183           | [16]                 |
| Pear                        | 120-510                     |                            |                             |                      |                      | 2772-4503      | [2,17,18]            |
| Banana                      | 255                         |                            |                             |                      |                      |                | [17]                 |
| Peach                       | 347                         |                            |                             |                      |                      |                | [17]                 |
| Apple                       | 222                         |                            |                             |                      |                      |                | [17]                 |
| <b>Vegetables</b>           |                             |                            |                             |                      |                      |                |                      |
| Tomato                      | 261-272                     | 2.15-5.95                  | 0.25-3.59                   |                      | 50.8                 | 1741           | [8,19,20]            |
| Pepper                      | 368                         | 7.93                       | 1.52                        |                      |                      |                | [20]                 |
| <b>Cereal crops</b>         |                             |                            |                             |                      |                      |                |                      |
| Maize                       | 291-2301                    | 3.1-15.3                   | 0.61-5.16                   | 1348-1671            | 186-3555             | 1051-11346     | [20–24]              |
| Wheat                       | 680-860                     | 7.5-13.8                   | 2.3-3.6                     | 1086-1910            |                      | 1841-10599     | [17,22,25]           |
| Rice                        | 370-3768                    | 11-17.8                    | 2.4-5.5                     | 1388-1429            | 947                  | 2641-3679      | [26–28]              |

Table S6 Field verification results in NC and SW.

| Region | Number | Treatment | Total fertilizer (kg ha <sup>-1</sup> ) |                               |                  | Yield<br>(t ha <sup>-1</sup> ) | PFP-N (kg kg <sup>-1</sup> ) | Impact category ( t <sup>-1</sup> ) |                         |             |                                 |                                |                                | REI       |
|--------|--------|-----------|-----------------------------------------|-------------------------------|------------------|--------------------------------|------------------------------|-------------------------------------|-------------------------|-------------|---------------------------------|--------------------------------|--------------------------------|-----------|
|        |        |           | N                                       | P <sub>2</sub> O <sub>5</sub> | K <sub>2</sub> O |                                |                              | LO<br>(m <sup>2</sup> )             | WD<br>(m <sup>3</sup> ) | ED<br>(MJ ) | GHG<br>(kg CO <sub>2</sub> -eq) | AP<br>(kg SO <sub>2</sub> -eq) | EP<br>(kg PO <sub>4</sub> -eq) |           |
|        |        |           |                                         |                               |                  |                                |                              |                                     |                         |             |                                 |                                |                                |           |
| NC     | 18HB01 | OPT-N     | 0                                       | 95                            | 301              | 50.0±5.84                      | -                            | 200±18.46                           | 5.06±1.02               | 581±50.26   | 23±5.36                         | 0.23±0.09                      | 0.03±0.01                      | 0.03±0.00 |
|        |        | OPT       | 263                                     | 95                            | 301              | 66.5±7.43                      | 253±11.88                    | 150±9.84                            | 8.16±0.98               | 673±49.25   | 68±16.25                        | 1.27±0.11                      | 0.37±0.05                      | 0.05±0.01 |
|        |        | FP        | 520                                     | 395                           | 480              | 62.1±4.68                      | 119±8.74                     | 161±10.65                           | 10.6±1.00               | 680±66.33   | 105±11.33                       | 2.4±0.52                       | 0.77±0.07                      | 0.08±0.02 |
|        | 18HB02 | OPT-N     | 0                                       | 95                            | 301              | 54.0±9.32                      | -                            | 185±18.88                           | 4.69±1.68               | 284±55.68   | 21±9.20                         | 0.21±0.08                      | 0.02±0.01                      | 0.03±0.01 |
|        |        | OPT       | 289                                     | 95                            | 301              | 62.3±8.42                      | 215±55.35                    | 161±15.96                           | 9.17±3.26               | 480±63.58   | 77±19.64                        | 1.46±0.68                      | 0.43±0.16                      | 0.06±0.02 |
|        |        | FP        | 410                                     | 150                           | 380              | 61.5±9.33                      | 150±37.42                    | 163±20.45                           | 12.97±2.07              | 609±46.52   | 104±22.35                       | 2.03±0.66                      | 0.62±0.25                      | 0.07±0.02 |
|        | 18HN01 | OPT-N     | 0                                       | 63                            | 200              | 39.6±6.32                      | -                            | 253±33.42                           | 3.86±2.06               | 305±78.48   | 18±9.32                         | 0.18±0.08                      | 0.01±0.00                      | 0.04±0.01 |
|        |        | OPT       | 174                                     | 63                            | 200              | 46.6±5.12                      | 268±32.15                    | 215±28.53                           | 7.39±3.59               | 448±86.95   | 63±35.69                        | 1.19±1.08                      | 0.35±0.03                      | 0.06±0.02 |
|        |        | FP        | 377                                     | 356                           | 359              | 40.6±7.33                      | 108±11.74                    | 246±36.52                           | 17.15±2.68              | 613±84.69   | 122±46.88                       | 2.66±1.02                      | 0.85±0.07                      | 0.10±0.02 |
|        | 18HN02 | OPT-N     | 0                                       | 63                            | 200              | 45.2±5.84                      | -                            | 221±18.96                           | 3.38±0.878              | 267±59.68   | 16±6.32                         | 0.16±0.03                      | 0.01±0.00                      | 0.04±0.02 |
|        |        | OPT       | 174                                     | 63                            | 200              | 46.9±3.44                      | 270±22.54                    | 213±17.53                           | 7.33±1.64               | 445±144.95  | 63±11.35                        | 1.18±0.16                      | 0.34±0.06                      | 0.06±0.02 |
|        |        | FP        | 370                                     | 335                           | 348              | 46.0±4.18                      | 124±11.30                    | 217±20.42                           | 14.18±3.55              | 527±168.95  | 105±19.68                       | 2.3±0.25                       | 0.73±0.06                      | 0.09±0.02 |
|        | 18HN03 | OPT-N     | 0                                       | 63                            | 200              | 60.0±6.41                      | -                            | 167±11.20                           | 2.55±0.96               | 201±48.96   | 12±3.25                         | 0.12±0.03                      | 0.01±0.00                      | 0.03±0.01 |
|        |        | OPT       | 174                                     | 63                            | 200              | 69.6±7.33                      | 400±15.84                    | 144±9.40                            | 4.95±3.58               | 300±57.32   | 42±6.85                         | 0.79±0.08                      | 0.23±0.01                      | 0.04±0.01 |
|        |        | FP        | 370                                     | 333                           | 343              | 63.6±6.19                      | 172±11.39                    | 157±12.53                           | 10.20±2.69              | 380±19.68   | 76±10.63                        | 1.66±0.24                      | 0.53±0.10                      | 0.06±0.01 |
| SW     | 18CQ01 | OPT-N     | 0                                       | 120                           | 240              | 15.6±3.47                      | -                            | 641±26.15                           | 15.66±0.99              | 1931±84.95  | 48±8.69                         | 0.42±0.06                      | 0.05±0.01                      | 0.10±0.01 |
|        |        | OPT       | 150                                     | 120                           | 240              | 26.8±7.20                      | 179±51.20                    | 372±18.95                           | 15.26±1.26              | 1404±76.54  | 99±9.63                         | 1.79±0.16                      | 0.53±0.12                      | 0.10±0.01 |
|        |        | FP        | 241                                     | 190                           | 267              | 26.0±6.58                      | 108±34.12                    | 385±16.33                           | 19.41±2.03              | 1533±103.85 | 139±13.52                       | 2.78a±0.27                     | 0.86±0.18                      | 0.12±0.01 |
|        | 18CQ02 | OPT-N     | 0                                       | 120                           | 240              | 19.2±2.58                      | -                            | 521±10.87                           | 11.44±0.86              | 456±48.63   | 21±5.32                         | 0.12±0.01                      | 0.03±0.00                      | 0.08±0.01 |
|        |        | OPT       | 150                                     | 120                           | 240              | 27.6±3.56                      | 184±27.35                    | 363±13.58b                          | 13.94±0.77              | 592±53.26   | 84±6.35                         | 1.59±0.35                      | 0.51±0.08                      | 0.09±0.01 |
|        |        | FP        | 261                                     | 176                           | 281              | 26.3±1.25                      | 101±16.58                    | 380±20.66                           | 18.33±1.52              | 750±83.62   | 134±16.35                       | 2.79±0.46                      | 0.91±0.12                      | 0.13±0.01 |

The cross intersection was the group mean and values were means ± SD.

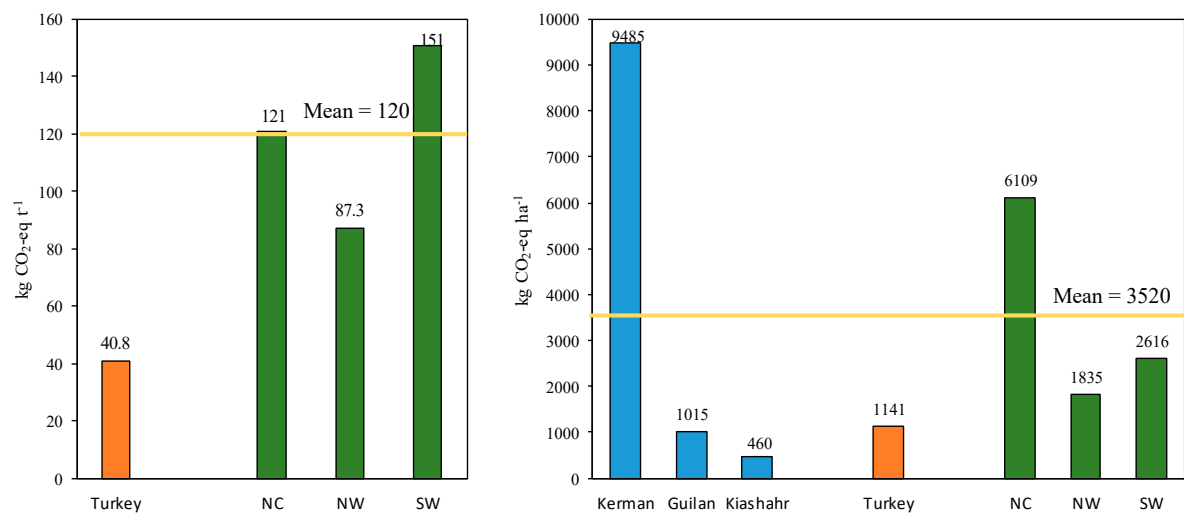

Figure S1. Greenhouse gas emissions per 1 ha and 1 ton of watermelon. GHG was the hotspot and the most influential category in current research. Hence, the GHG potentials of watermelon production in different regions of the same country were collected and shown in the form of pillars, while the yellow line represented the average potential for GHG in several areas of China.

## References

- 1 Cui, Z.L., Yue, S.C., Wang, G.L., Meng, Q.F., Wu, L., Yang, Z.P., Zhang, Q., Li, S.Q., Zhang, F.S., Chen, X.P., 2013. In-season root-zone N management for mitigating greenhouse gas emission and reactive N losses in intensive wheat production. *Environ. Sci. Technol.* 47, 6015-6022.
- 2 Liu, Y.X., Langer, V., Høgh-Jensen, H., Egelyng, H., 2010. Life Cycle Assessment of fossil energy use and greenhouse gas emissions in Chinese pear production. *J. Clean. Prod.* 18, 1423-1430.
- 3 Pishgar-Komleh, S.H., Omid, M., Heidari, M.D., 2013. On the study of energy use and GHG (greenhouse gas) emissions in greenhouse cucumber production in Yazd province. *Energy* 59, 63-71.
- 4 Yue, S.C., 2013. Optimum Nitrogen Management for High-yielding Wheat and Maize Cropping System. China Agricultural University Press, Beijing, p. 80.
- 5 Zhang, W.F., Dou, Z.X., He, P., Ju, X.T., Powlson, D., Chadwick, D., Norse, D., Lu, Y.L., Zhang, Y., Wu, L., Chen, X.P., Cassman, K.G., Zhang, F.S., 2013. New technologies reduce greenhouse gas emissions from nitrogenous fertilizer in China. *Proc. Natl. Acad. Sci. U. S. A.* 110, 8375-8380.
- 6 Pahlavan, R., Omid, M., Akram, A., 2012. Energy input-output analysis and application of artificial neural networks for predicting greenhouse basil production. *Energy* 37, 171-176.
- 7 Clark, S., Khoshnevisan, B., Sefeedpari, P., 2016. Energy efficiency and greenhouse gas emissions during transition to organic and reduced-input practices: student farm case study. *Ecol. Eng.* 88, 186-194.
- 8 He, X.Q., Qiao, Y.H., Liu, Y.X., Dendler, L., Yin, C., Martin, F., 2016. Environmental impact assessment of organic and conventional tomato production in urban greenhouses of Beijing city, China. *J. Clean. Prod.* 134, 251-258.
- 9 Ti, C., Luo, Y., Yan, X., 2015. Characteristics of nitrogen balance in open-air and greenhouse vegetable cropping systems of China. *Environ. Sci. Pollut. R.* 22, 18508-18518.
- 10 Zhao, C.S., Hu, C.X., Huang, W., Sun, X.C., Tan, Q.L., Di, H.J., 2010. A lysimeter study of nitrate leaching and optimum nitrogen application rates for intensively irrigated vegetable production systems in Central China. *J. Soil. Sediment.* 10, 9-17.

- 11 Pan Z.Y., Wu W.L., Liu G.D., Gao X.W., 2004. Effect of straw return and nitrogen fertilizer application on the N<sub>2</sub>O emission of soil. *Soil fertilizer*.6-8. (in Chinese).
- 12 Zeng J.H., Wang Z.P.,1995. Study on N<sub>2</sub>O generation and emission of farmland soil. *Chin. J. Soil Sci.* 132-134-131. (in Chinese).
- 13 Perrin, A., Basset-Mens, C., Gabrielle, B., 2014. Life cycle assessment of vegetable products: a review focusing on cropping systems diversity and the estimation of field emissions. *Int. J. Life Cycle Assess.* 19, 1247-1263.
- 14 Nemecek, T., von Richthofen, J.S., Dubois, G., Casta, P., Charles, R., Pahl, H., 2008. Environmental impacts of introducing grain legumes into European crop rotations. *Eur. J. Agron.* 28, 380-393.
- 15 Wang, M., Wu, W., Liu, W., Bao, Y., 2007. Life cycle assessment of the winter wheatsummer maize production system on the North China Plain. *Int. J. Sust. Dev. World* 14, 400-407.
- 16 Li C.L., Zhao G.S., Wang Y.C., Wang D.W., 2015. Environmental Impact of Organic and Conventional Strawberry Production in North China Based on Life Cycle Assessment. *Chin. Sci. Bull.* 31,102-108. (in Chinese).
- 17 Yan, M., Cheng, K., Luo, T., Yan, Y., Pan, G., Rees, R.M., 2015. Carbon footprint of grain crop production in China-based on farm survey data. *J. Clean. Prod.* 104, 130-138.
- 18 Yang Z.L., Fu J.L., Gao T.Y., Chai D.D., Wu Y.J., Li Z.X., Wang L.F.,2016. Research on Carbon Footprint for Management Activity of Urban Modern Agriculture in Beijing——A Case Study of *Pyrus ussuriensis* Maxim. cv. Jingbaili Orchards in Mentougou District. *Chin. Sci. Bull.* 32,128-134. (in Chinese).
- 19 Wang X.Q., Wu Q.Q., Zhou J.B., Chen Y., Wu Q.F., 2014. Life cycle assessment of tomato production in greenhouses. *Acta Sci. Circumst.* 34,2940-2947. (in Chinese).
- 20 Wang, F., Wang, C., Liu, Q.Q., Zhang, H.Y., 2017. Environmental impact assessment in summer maize system in different periods of Quzhou County in Hebe. *J. China Agric. Univ.* 22, 11-20.
- 21 Wang, M.X., Wu, W.L., Xia, X.F.2010.Life cycle environmental assessment of summer maize in a North China high-yield region[ J ].*Acta Sci. Circumst.* 30, 1339 -1344. (in Chinese).
- 22 Peng, X.Y., Wu, X.H., Wu, Q.F., Wang, X.Q., Tong, X.G., 2015. Life Cycle Assessment of Winter Wheat-Summer Maize Rotation System in Guanzhong Region of Shaanxi Province. *J. Agro-Environ. Sci.* 34, 809-816.(in Chinese).



- 23 Zhao, R.R., He, P., Xie, J.G., Johnston, A.M., Xu, X.P., Qiu, S.J., Zhao, S.C., 2016. Ecological intensification management of maize in northeast China: agronomic and environmental response. *Agric. ecosys. Environ.* 224, 123-130.
- 24 Zhang, W.S., He, X.M., Zhang, Z.D., Gong, S., Zhang, Y.Q., Zhang, W., Liu, D.Y., Zou, C.Q., Chen, X.P., 2018. Carbon footprint assessment for irrigated and rainfed maize (*Zea mays* L.) production on the Loess Plateau of China. *Biosyst. Eng.* 167, 75-86.
- 25 Li Z.Y., Wang X., Gao Z.L., Ma W.Q., 2010. Life Cycle Assessment of Wheat Fertilization in Different Regions of China. *J. Agro-Environ. Sci.* 29, 1417-1422. (in Chinese).
- 26 Liang L., Chen Y.Q., Gao W.S., 2009. Framework Study and Application of Agricultural Life Cycle Assessment in China: A Case Study of Winter Wheat Production in Luancheng of Hebei. *CHINA POPULATION, RESOURCES AND ENVIRONMENT*. 19, 154-160.
- 27 Wang, M.X., Xia, X.F., Liu, J.G., Chai, Y.H., Lei, C.S., 2009. Life Cycle Assessment of High-yielding Rice in Taihu Region. *J. Agro-Environ. Sci.* 28, 420-424. (in Chinese).
- 28 He, X.Q., Qiao, Y.H., Liang, L., Knudsen, M.T., Martin, F., 2018. Environmental life cycle assessment of long-term organic rice production in subtropical China. *J. Clean. Prod.* 176, 880-888.
